# Supplementary material
Source: MDPI journal article supplement (https://www.mdpi.com/2073-4433/10/4/187)
Supplement: s1 [file s1]

## Supplemental Figures

**Table S1.** Differences of CH<sub>4</sub> mixing ratios (nmol mol<sup>-1</sup>) between the sites.

| Pairs of Sites | Difference in Means | P-Value |
|----------------|---------------------|---------|
| Barrow–Alert   | 10.6                | 0.02    |
| Barrow–Summit  | 18.8                | 0.00    |
| Barrow–Tiksi   | −14.9               | 0.00    |
| Tiksi–Alert    | 25.5                | 0.00    |
| Tiksi–Summit   | 33.7                | 0.00    |
| Alert–Summit   | 8.2                 | 0.10    |

**Table S2.** Summary of monthly temperature correlations between 1986–2014 with a significance level of 0.05. Bold indicates statistical significance.

| Month            | Correlation | P-Value     |
|------------------|-------------|-------------|
| January          | 0.19        | 0.33        |
| February         | −0.04       | 0.85        |
| March            | 0.16        | 0.43        |
| April            | 0.18        | 0.36        |
| May              | 0.09        | 0.63        |
| June             | 0.22        | 0.26        |
| July             | 0.16        | 0.41        |
| <b>August</b>    | <b>0.37</b> | <b>0.05</b> |
| <b>September</b> | <b>0.44</b> | <b>0.02</b> |
| <b>October</b>   | <b>0.50</b> | <b>0.01</b> |
| <b>November</b>  | <b>0.56</b> | <b>0.00</b> |
| December         | 0.28        | 0.14        |

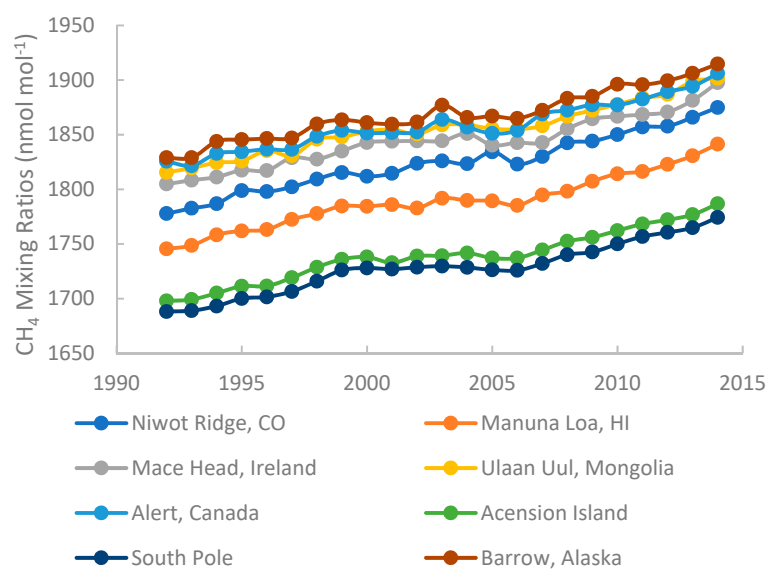

**Figure S1.** Time series of CH<sub>4</sub> mixing ratios from 10 different sites worldwide.

a)

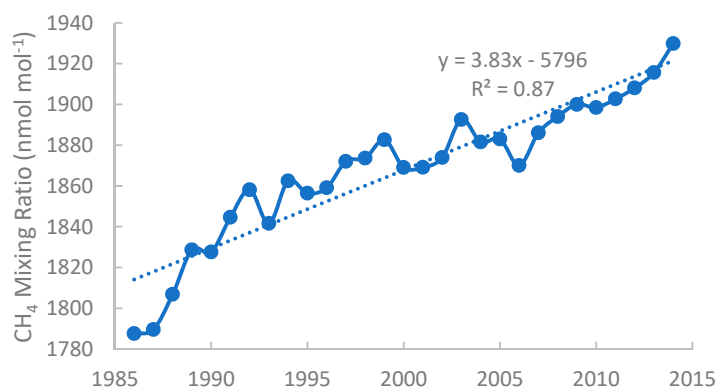

b)

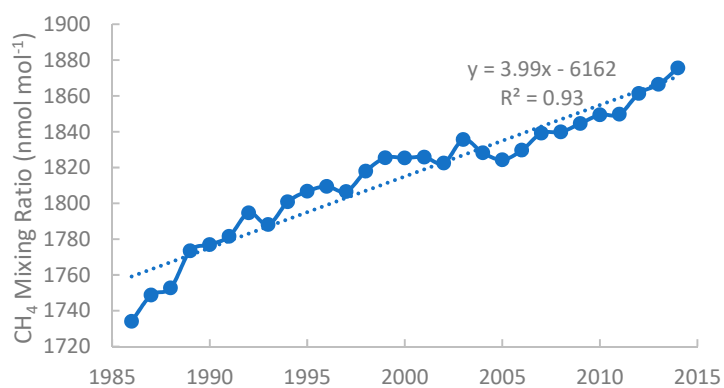

c)

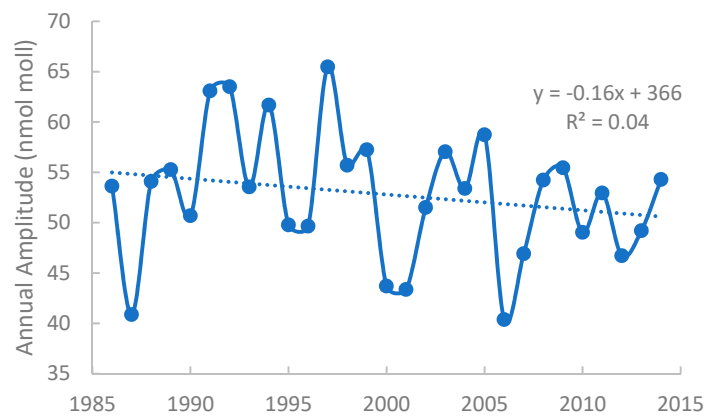

**Figure S2.** Annual maximums (a) and minimums (b) as well as annual amplitude (c) of CH<sub>4</sub> mixing ratios in Alert.

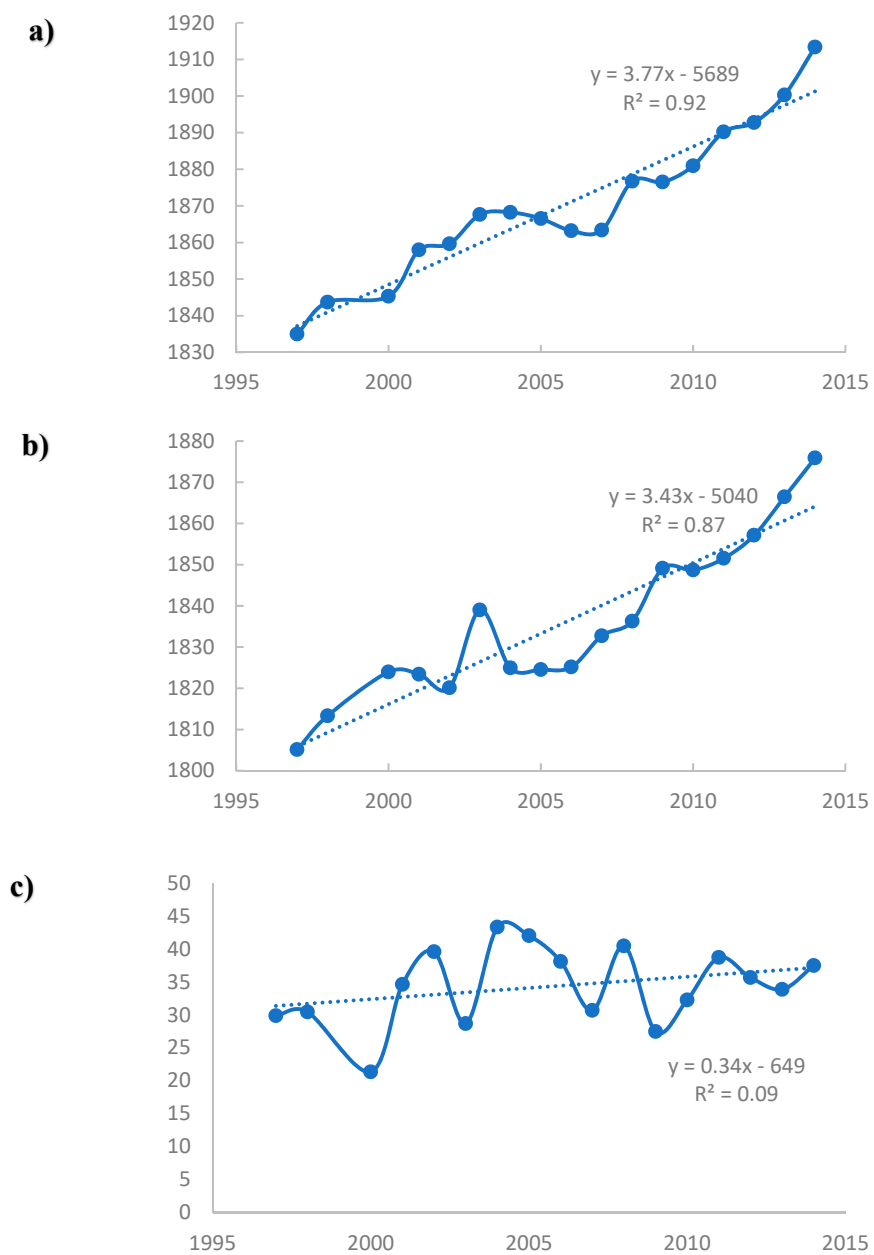

**Figure S3.** Annual maximums (a) and minimums (b) as well as annual amplitude (c) of CH<sub>4</sub> mixing ratios in Summit.

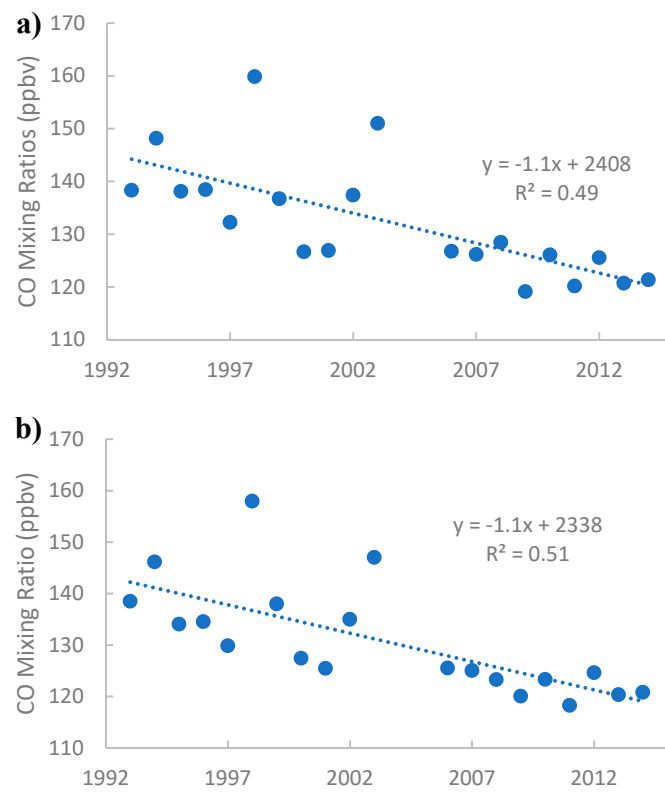

**Figure S4.** Time series of annual mean mixing ratios of CO for **(a)** Barrow and **(b)** Alert. .

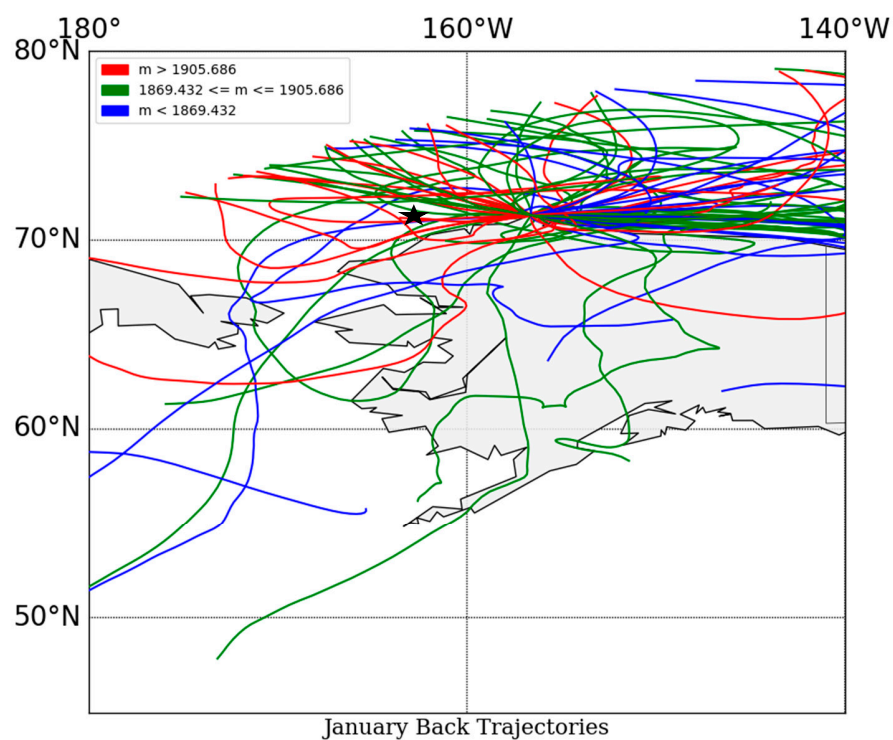

**Figure S5.** Individual trajectories for the month January between 1992–2012, with their corresponding CH<sub>4</sub> mixing ratios, in Barrow. Blue represents CH<sub>4</sub> mixing ratios below the 25<sup>th</sup> percentile of mixing ratios, green represents between the 25<sup>th</sup> and 75<sup>th</sup> percentile of mixing ratios, red represents greater than the 75<sup>th</sup> percentile mixing ratios.
